# Supplementary material for: Predicting preoperative lymph node metastasis in patients with high-grade serous ovarian cancer by using intratumoral and peritumoral radiomics: A retrospective cohort study
Source: Research Square preprint supplement (doi:10.21203/rs.3.rs-6437209/v1), 2025-05-20
Supplement: Supplementary file 1 [file 4bd646ee9d15ec40e2affda5.docx]

**Table S1：Diagnostic efficiency of different classifiers in the training and test cohorts**

| **Machine learning model** | **Group** | **Accuracy** | **95% CI** | **AUC** | **Sensitivity** | **Specificity** |
| --- | --- | --- | --- | --- | --- | --- |
| LR | Train | 0.722 | 0.6791–0.8465 | 0.763 | 0.690 | 0.744 |
|  | Test | 0.710 | 0.6861–0.8636 | 0.775 | 0.706 | 0.711 |
| RandomForest | Train | 0.826 | 0.8339–0.9428 | 0.888 | 0.724 | 0.895 |
|  | Test | 0.694 | 0.6012– 0.8044 | 0.703 | 0.559 | 0.744 |
| ExtraTrees | Train | 0.896 | 0.9292–0.9866 | 0.958 | 0.845 | 0.930 |
|  | Test | 0.669 | 0.7014–0.8665 | 0.784 | 0.824 | 0.611 |
| XGBoost | Train | 0.882 | 0.9290–0.9842 | 0.957 | 0.810 | 0.930 |
|  | Test | 0.718 | 0.7357–0.8924 | 0.814 | 0.765 | 0.700 |
| GradientBoosting | Train | 0.896 | 0.9244–0.9839 | 0.954 | 0.845 | 0.930 |
|  | Test | 0.702 | 0.6549–0.8487 | 0.752 | 0.559 | 0.756 |
| AdaBoost | Train | 0.819 | 0.8043–0.9293 | 0.867 | 0.724 | 0.884 |
|  | Test | 0.758 | 0.6630–0.8540 | 0.758 | 0.588 | 0.822 |
| MLP | Train | 0.729 | 0.6669–0.8380 | 0.752 | 0.621 | 0.802 |
|  | Test | 0.661 | 0.6625–0.8591 | 0.761 | 0.824 | 0.600 |

**A Predictive Model for preoperative lymph node metastasis.The formula based on radiomic features selected by LASSO.**

label = 0.40816326530612257 + +0.038928 * intra_lbp_3D_k_gldm_SmallDependenceHighGrayLevelEmphasis -0.045103 * intra_lbp_3D_m2_glszm_SmallAreaHighGrayLevelEmphasis -0.051802 * intra_original_shape_Sphericity +0.054652 * intra_wavelet_HHL_firstorder_Skewness -0.005170 * intra_wavelet_HHL_glszm_SmallAreaHighGrayLevelEmphasis -0.008930 * intra_wavelet_HLH_glszm_ZoneEntropy -0.034203 * intra_wavelet_LHH_glcm_Correlation -0.050449 * intra_wavelet_LLH_glszm_ZoneEntropy -0.017202 * intra_wavelet_LLL_glszm_LargeAreaHighGrayLevelEmphasis
